# Supplementary material
Source: publisher figshare collection journal article supplement (https://frontiersin.figshare.com/ndownloader/files/27567518)
Supplement: Supplementary file 1 [file 27567518]

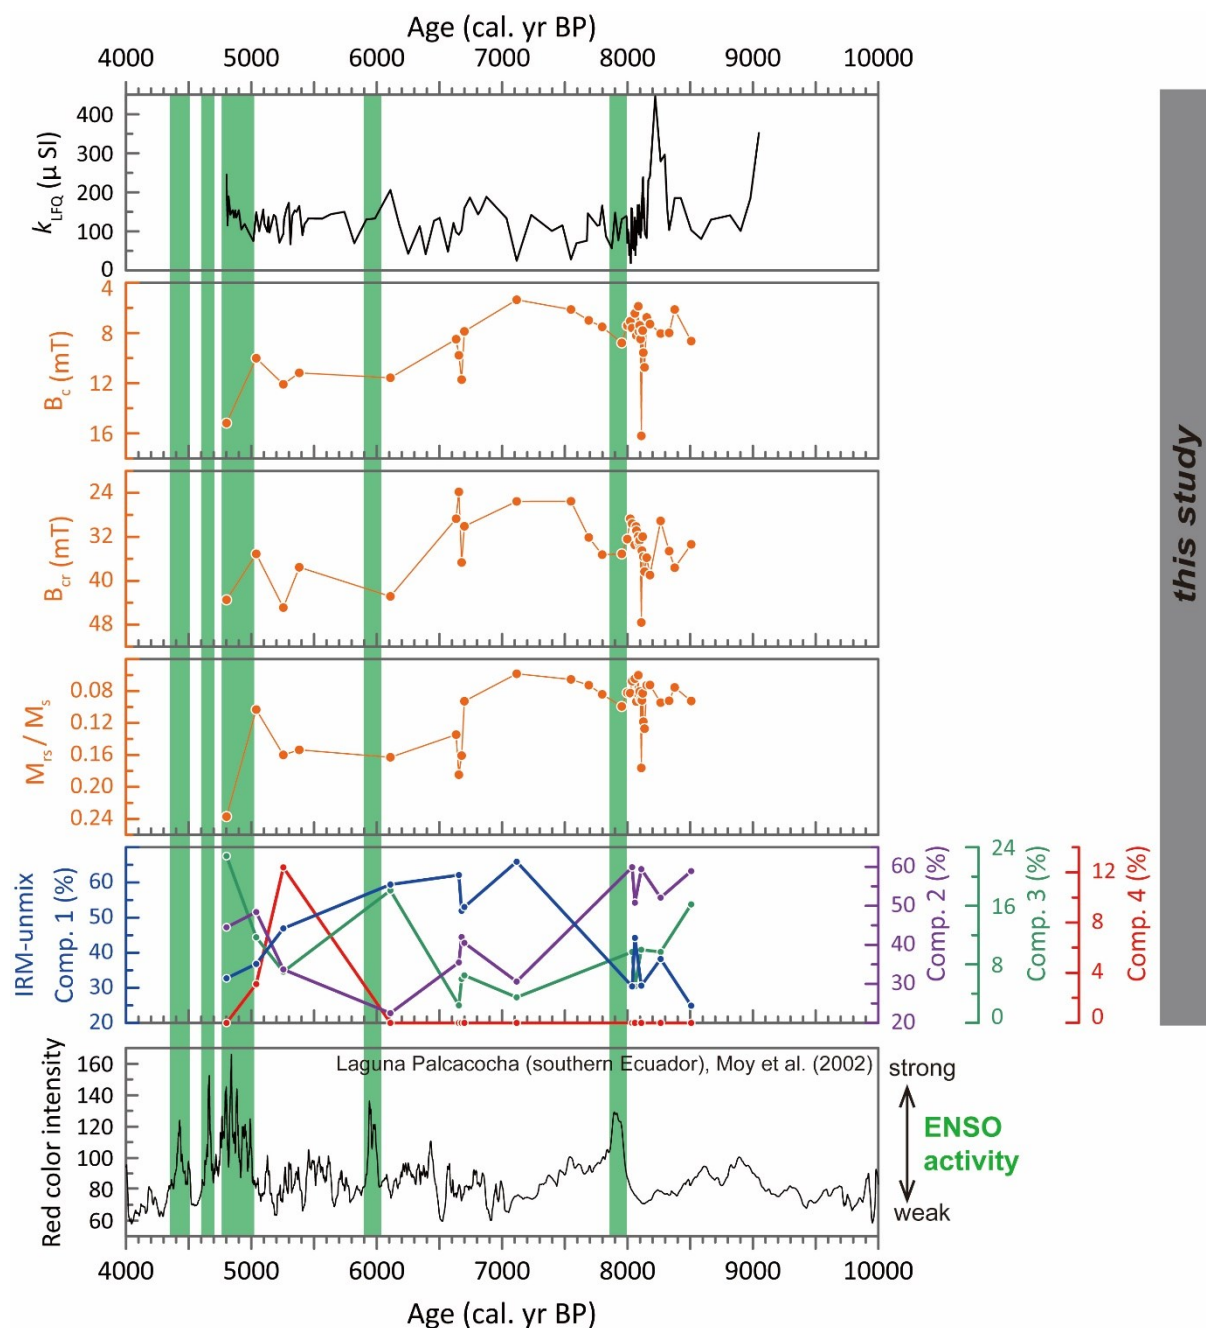

**Figure S2.** Comparisons between red color intensity from the Lake Palcacocha (Moy et al., 2002) as an ENSO activity index and some selective magnetic properties presented in this study (see text for details). Relatively high peaks in red color intensity showing high ENSO activity are indicated by green shading.
